# Supplementary material for: On the mechanical response of graphene-capped copper nanoparticles
Source: Royal Society of Chemistry journal article supplement (doi:10.1039/d3cp05273g), 2023-12-13
Supplement: d3cp05273g1.pdf [file d3cp05273g1.pdf]

## On the mechanical response of graphene-capped copper nanoparticles

Gabriel J. Olguín-Orellana,<sup>a</sup> Juan A. de la Rosa Abad,<sup>b</sup> María B. Camarada,<sup>c</sup> Sergio J. Mejía-Rosales,<sup>d</sup> Jans Alzate-Morales<sup>a</sup> and Marcelo M. Mariscal<sup>\*b</sup>

### Electronic Supplementary Information

**Table S1** Summary of the atomic composition for the two systems which were studied.

| System  | Cu atoms (NP) | Cu atoms (bulk surface) | C atoms | H atoms | Total atoms  |
|---------|---------------|-------------------------|---------|---------|--------------|
| Cu NP   | 9201          | 13312                   | -       | -       | <b>22513</b> |
| Cu@G NP | 9201          | 13312                   | 5068    | 728     | <b>28309</b> |

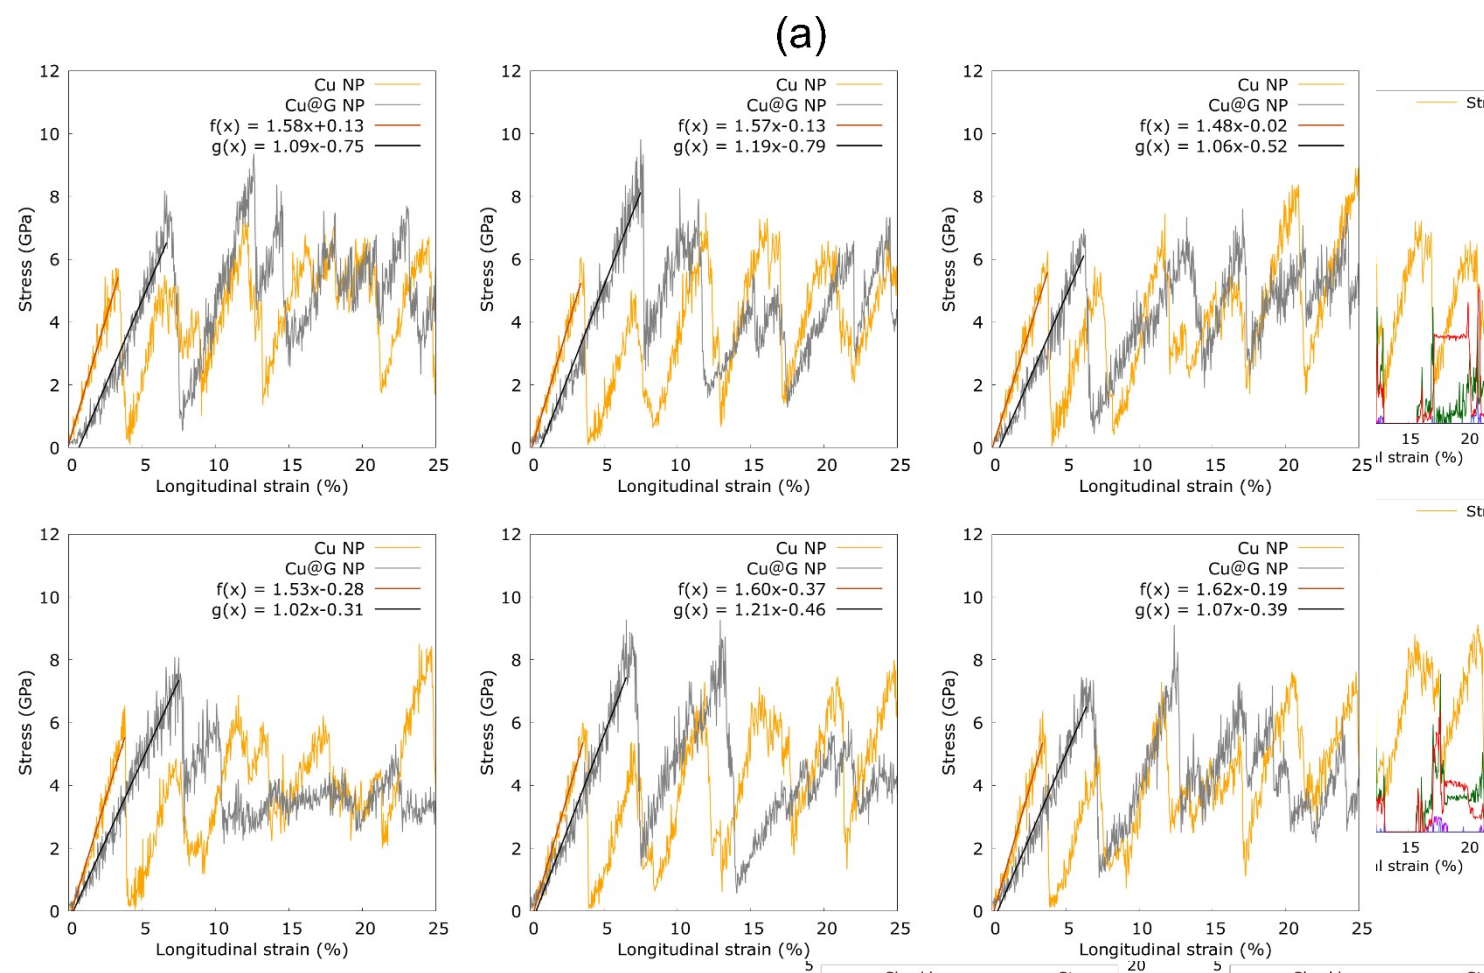

**Fig. S1** Stress-strain curves for the six repetitions of the simulation ran for the Cu and Cu@G NPs systems.

<sup>a</sup> Center for Bioinformatics, Simulation and Modeling (CBSM), Faculty of Engineering

<sup>b</sup> INFIQC, CONICET. Departamento de Química Teórica y Computacional, Facultad de Ingeniería, Universidad Nacional del Comahue, Bariloche, Argentina. [marcelo.mariscal@unc.edu.ar](mailto:marcelo.mariscal@unc.edu.ar)

<sup>c</sup> Institute of Nanotechnology, Karlsruhe Institute of Technology (KIT), P.O. Box 364

<sup>d</sup> Centro de Investigación en Ciencias Físico-Matemáticas (CICFIM), Facultad de Ciencias Exactas y Naturales, Universidad de León, México.

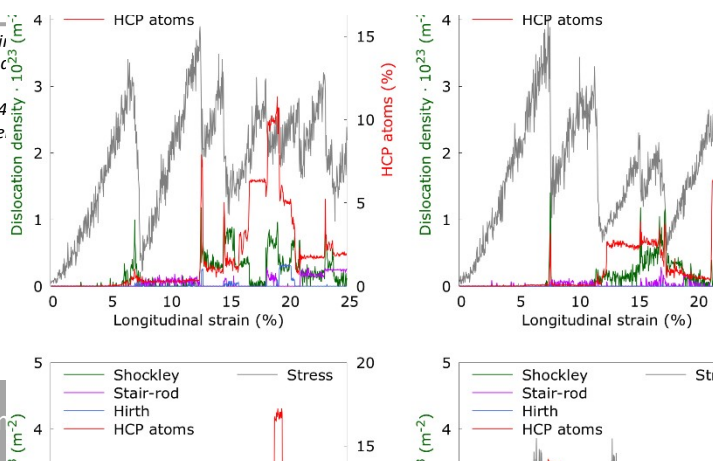

**Fig. S2** Dislocation density and HCP atoms vs strain curves for the six repetitions of the simulation ran for the (a) Cu NP and (b) Cu@G NP systems. In the background, it can be seen the stress-strain curve with the stress on a scale from 0 to 12 GPa.
